# Supplementary material for: Substantial Reduction in Vegetation Photosynthesis Capacity during Compound Droughts in the Three-River Headwaters Region, China
Source: MDPI journal article supplement (doi:10.3390/rs15204943), 2023-10-13
Supplement: s1 [file s1]

Archive with 1 entries (1 files):
- remotesensing-2622574-supplementary.pdf
